# Supplementary material
Source: PubMed Central journal article supplement (PMC7864588)
Supplement: NIHMS1662059-supplement-4.pdf [file NIHMS1662059-supplement-4.pdf]

**Supplementary table 1:** Coordinates from regions showing significantly larger SUVR in GWI compared to HC in the voxel-wise analysis ( $p < 0.05$ , corrected).

| Cluster | Voxels | P        | Z-MAX | MNI coordinates (mm)            |     |     | label                              |
|---------|--------|----------|-------|---------------------------------|-----|-----|------------------------------------|
|         |        |          |       | X                               | Y   | Z   |                                    |
| 1       | 20424  | 4.29E-20 | 4.75  | -12                             | -62 | 46  | L precuneus                        |
|         |        |          | 4.74  | 24                              | 76  | 50  | R dorsolateral prefrontal cortex   |
|         |        |          | 4.74  | 40                              | -58 | 10  | R lateral occipital cortex         |
|         |        |          | 4.25  | -18                             | 2   | 54  | L dorsolateral prefrontal cortex   |
|         |        |          | 3.98  | -12                             | 40  | 24  | L anterior mid cingulate cortex    |
|         |        |          | 3.87  | 8                               | -50 | 50  | R precuneus                        |
|         |        |          | 3.86  | -34                             | 36  | 2   | L ventrolateral prefrontal cortex  |
|         |        |          | 3.85  | 6                               | -42 | 40  | R subparietal sulcus/precuneus     |
|         |        |          | 3.77  | 10                              | 34  | -14 | R ventromedial prefrontal cortex   |
|         |        |          | 3.76  | 44                              | 38  | -10 | R ventrolateral prefrontal cortex  |
|         |        |          | 3.71  | 42                              | 32  | 10  | R frontoinsular cortex             |
|         |        |          | 3.68  | 12                              | -16 | 48  | R mid cingulate cortex             |
|         |        |          | 3.67  | 20                              | 14  | 58  | R dorsolateral prefrontal cortex   |
|         |        |          | 3.66  | 48                              | -4  | 13  | R inferior prefrontal cortex       |
|         |        |          | 3.47  | 54                              | -28 | 30  | R posterior parietal cortex        |
|         |        |          | 3.45  | 54                              | -24 | 43  | R inferior parietal cortex         |
|         |        |          | 3.31  | 36                              | -36 | 52  | R superior parietal cortex         |
|         |        |          | 3.09  | 12                              | -34 | 54  | R primary somatosensory cortex     |
|         |        |          | 3.07  | -14                             | -34 | 56  | L primary somatosensory cortex     |
|         |        |          | 3.05  | 20                              | 8   | 4   | R putamen                          |
| 3.04    | -8     | 38       | -4    | L anterior paracingulate cortex |     |     |                                    |
| 2.63    | -18    | -24      | 66    | L primary motor cortex          |     |     |                                    |
| 2.61    | 6      | -46      | 30    | R posterior cingulate cortex    |     |     |                                    |
| 2.48    | 26     | -22      | 65    | R primary motor cortex          |     |     |                                    |
| 2       | 1273   | 0.0157   | 4.06  | 56                              | -18 | -14 | R middle temporal gyrus            |
|         |        |          | 3.61  | 44                              | 0   | -31 | R middle temporal gyrus (anterior) |
